# Supplementary material for: Centrilobular emphysema and airway dysanapsis: factors associated with low respiratory function in younger smokers
Source: PubMed Central journal article supplement — ERJ Open Res. 2024 Mar 4;10(2):00695-2023. doi: 10.1183/23120541.00695-2023 (PMC10910308; doi:10.1183/23120541.00695-2023), 2024-03-04
Supplement: 00695-2023.SUPPLEMENT.pdf [file 00695-2023.SUPPLEMENT.pdf]

# **Centrilobular emphysema and airway dysanapsis: Factors associated with low respiratory function in younger smokers**

## **Online supplement**

### **Contents**

- **Table S1. Interobserver agreements for visual assessments of each emphysema subtype**
- **Table S2. Correlations between lung function and parameters**
- **Table S3. Correlations between lung function and CT parameters**
- **Table S4. The comparison of lung function in two groups divided by 5% threshold of LAA%**
- **Table S5. Multivariable regression analysis for FEV<sub>1</sub>/FVC**
- **Table S6. Multivariable regression analysis for FEV<sub>1</sub> % predicted**
- **Table S7. Multivariable regression analysis for FEV<sub>1</sub>/FVC predicted including interaction term between CLE and ALR**
- **Table S8. Multivariable regression analysis for FEV<sub>1</sub> % predicted including interaction term between CLE and ALR**
- **Table S9. Multivariable regression analysis for FEV<sub>1</sub>/FVC in subjects without a history of asthma**
- **Table S10. Multivariable regression analysis for FEV<sub>1</sub> % predicted in subjects without a history of asthma**

**Table S1. Interobserver agreements for visual assessments of each emphysema subtype**

| Observer                 | Number of cases | Weighted kappa coefficient<br>for PSE | Weighted kappa coefficient<br>for CLE |
|--------------------------|-----------------|---------------------------------------|---------------------------------------|
| Observer 1 vs Observer 2 | 132             | 0.90                                  | 0.84                                  |
| Observer 3 vs Observer 4 | 40              | 0.87                                  | 1.00                                  |

Abbreviations: CLE, centrilobular emphysema; PSE, paraseptal emphysema.

**Table S2. Correlations between lung function and parameters**

|                              | FEV <sub>1</sub> /FVC | <i>P</i> value | FEV <sub>1</sub> %<br>predicted | <i>P</i> value |
|------------------------------|-----------------------|----------------|---------------------------------|----------------|
| Sex, male                    | 0.80 ± 0.06           | 0.039          | 94.4 ± 12.0                     | 0.602          |
| female                       | 0.83 ± 0.05           |                | 95.9 ± 11.2                     |                |
| Smoking status, current      | 0.81 ± 0.06           | 0.770          | 94.4 ± 12.3                     | 0.583          |
| former                       | 0.80 ± 0.06           |                | 95.8 ± 9.8                      |                |
| Asthma, Yes                  | 0.80 ± 0.07           | 0.737          | 92.8 ± 10.5                     | 0.708          |
| No                           | 0.81 ± 0.06           |                | 94.7 ± 12.0                     |                |
| Diabetes, Yes                | 0.85 ± 0.03           | 0.136          | 98.9 ± 5.6                      | 0.419          |
| No                           | 0.81 ± 0.06           |                | 94.5 ± 12.0                     |                |
| Dyslipidaemia, Yes           | 0.83 ± 0.07           | 0.102          | 94.3 ± 11.2                     | 0.925          |
| No                           | 0.80 ± 0.06           |                | 94.6 ± 12.0                     |                |
| Hypertension, Yes            | 0.82 ± 0.06           | 0.320          | 93.0 ± 13.6                     | 0.556          |
| No                           | 0.81 ± 0.06           |                | 94.8 ± 11.7                     |                |
| Arrhythmia, Yes              | 0.82 ± 0.04           | 0.623          | 93.0 ± 12.0                     | 0.661          |
| No                           | 0.81 ± 0.06           |                | 94.7 ± 12.0                     |                |
| Coronary artery disease, Yes | 0.74 ± 0.15           | 0.101          | 87.2 ± 3.3                      | 0.380          |
| No                           | 0.81 ± 0.06           |                | 94.7 ± 12.0                     |                |

Data are presented as the means ± standard deviations.

Abbreviations: FEV<sub>1</sub>, forced expiratory volume in 1 second; FVC, forced vital capacity.

**Table S3. Correlations between lung function and CT parameters**

|            | FEV <sub>1</sub> /FVC |                | FEV <sub>1</sub> % predicted |                | Abbreviations: ALR, airway-to-lung ratio; FEV1, forced expiratory volume in 1 second; FVC, forced vital capacity; WT, wall thickness. |
|------------|-----------------------|----------------|------------------------------|----------------|---------------------------------------------------------------------------------------------------------------------------------------|
|            | <i>r</i>              | <i>P</i> value | <i>r</i>                     | <i>P</i> value |                                                                                                                                       |
| WT segment | 0.04                  | 0.64           | -0.10                        | 0.19           |                                                                                                                                       |
| subsegment | 0.16                  | 0.04           | -0.02                        | 0.80           |                                                                                                                                       |
| ALR        | 0.35                  | <.0001         | 0.26                         | 0.0007         |                                                                                                                                       |

**Table S4. The comparison of lung function in two groups divided by 5% threshold of LAA%**

|                           | LAA% <5%    | LAA% ≥5%    | <i>P</i> value |
|---------------------------|-------------|-------------|----------------|
| N (%)                     | 143 (83.1)  | 29 (16.9)   |                |
| FEV <sub>1</sub> /FVC     | 0.81 ± 0.05 | 0.77 ± 0.07 | 0.0004         |
| FEV <sub>1</sub> , % pred | 94.4 ± 11.8 | 95.6 ± 12.4 | 0.61           |

Abbreviations: FEV<sub>1</sub>, forced expiratory volume in 1 second; FVC, forced vital capacity; LAA% = the percentage of low attenuation area at -950 Hounsfield Units divided by the total lung capacity on a CT scan.

**Table S5. Multivariable regression analysis for FEV<sub>1</sub>/FVC**

|                                          | Model 1                | Model 2                | Model 3                | Model 4                |
|------------------------------------------|------------------------|------------------------|------------------------|------------------------|
| Visual emphysema +                       | -0.83 (-1.69, 0.03)    |                        |                        |                        |
| CLE +                                    |                        | -1.57 (-2.58, -0.57)** |                        | -1.60 (-2.66, -0.54)** |
| PSE +                                    |                        |                        | -0.35 (-1.27, 0.56)    | 0.08 (-0.86, 1.02)     |
| WT segmental<br>per 1 mm increase        | 0.48 (-7.93, 8.89)     | 1.57 (-6.72, 9.87)     | -0.50 (-8.94, 7.93)    | 1.52 (-6.83, 9.87)     |
| ALR<br>per 0.01 increase                 | 6.96 (4.41, 9.50)****  | 7.02 (4.52, 9.53)****  | 6.82 (4.25, 9.39)****  | 7.04 (4.52, 9.55)****  |
| Age,<br>per 1-year increase              | -0.15 (-0.45, 0.15)    | -0.11 (-0.41, 0.19)    | -0.17 (-0.47, 0.14)    | -0.11 (-0.41, 0.19)    |
| Male                                     | -1.93 (-3.27, -0.59)** | -2.10 (-3.41, -0.78)** | -1.94 (-3.30, -0.59)** | -2.11 (-3.44, -0.78)** |
| BMI,<br>per 1-kg/m <sup>2</sup> increase | 0.03 (-0.23, 0.29)     | 0.00 (-0.26, 0.25)     | 0.07 (-0.19, 0.34)     | 0.00 (-0.26, 0.26)     |
| Smoking status, current                  | 0.20 (-0.91, 1.31)     | 0.16 (-0.93, 1.25)     | 0.15 (-0.97, 1.28)     | 0.15 (-0.95, 1.25)     |

Data are presented as the estimate (95% confidence interval). \*\* $p < 0.01$ ; \*\*\* $p < 0.001$ ; \*\*\*\* $p < 0.0001$ .

Abbreviations: ALR, airway-to-lung ratio; BMI, body mass index; CLE, centrilobular emphysema; FEV<sub>1</sub>, forced expiratory volume in 1 second; FVC, forced vital capacity; PSE, paraseptal emphysema; WT, wall thickness.

**Table S6. Multivariable regression analysis for FEV<sub>1</sub> % predicted**

|                                          | Model 1               | Model 2               | Model 3              | Model 4               |
|------------------------------------------|-----------------------|-----------------------|----------------------|-----------------------|
| Visual emphysema +                       | -1.82 (-3.67, 0.04)   |                       |                      |                       |
| CLE +                                    |                       | -2.79 (-4.98, -0.60)* |                      | -2.63 (-4.93, -0.32)* |
| PSE +                                    |                       |                       | -1.19 (-3.16, 0.77)  | -0.48 (-2.52, 1.56)   |
| WT segmental<br>per 1 mm increase        | -11.8 (-30.0, 6.31)   | -10.5 (-28.5, 7.59)   | -13.4 (-31.6, 4.72)  | -10.1 (-28.3, 8.06)   |
| ALR<br>per 0.01 increase                 | 11.1 (5.66, 16.6)**** | 11.2 (5.79, 16.7)**** | 10.8 (5.26, 16.3)*** | 11.1 (5.68, 16.6)**** |
| Age,<br>per 1-year increase              | -0.27 (-0.92, 0.38)   | -0.20 (-0.85, 0.44)   | -0.31 (-0.96, 0.34)  | -0.21 (-0.86, 0.44)   |
| Male                                     | -0.77 (-3.65, 2.11)   | -1.09 (-3.95, 1.77)   | -0.74 (-3.65, 2.17)  | -1.01 (-3.90, 1.87)   |
| BMI,<br>per 1-kg/m <sup>2</sup> increase | -0.17 (-0.74, 0.39)   | -0.20 (-0.76, 0.35)   | -0.11 (-0.67, 0.46)  | -0.23 (-0.79, 0.34)   |
| Smoking status, current                  | -0.34 (-2.73, 2.06)   | -0.44 (-2.82, 1.93)   | -0.37 (-2.80, 2.05)  | -0.38 (-2.77, 2.01)   |

Data are presented as the estimate (95% confidence interval). \* $p < 0.05$ ; \*\*\* $p < 0.001$ ; \*\*\*\* $p < 0.0001$ .

Abbreviations: ALR, airway-to-lung ratio; BMI, body mass index; CLE, centrilobular emphysema; FEV<sub>1</sub>, forced expiratory volume in 1 second; PSE, paraseptal emphysema; WT, wall thickness.

**Table S7. Multivariable regression analysis for FEV<sub>1</sub>/FVC predicted including interaction term between CLE and ALR**

|                                          | Model 1                 | Model 2                 |
|------------------------------------------|-------------------------|-------------------------|
| Visual emphysema +                       |                         |                         |
| CLE +                                    | -1.53 (-2.51, -0.56)**  | -1.52 (-2.56, -0.48)**  |
| PSE +                                    |                         | -0.05 (-0.97, 0.88)     |
| WT subsegment<br>per 1 mm increase       | 9.87 (-1.47, 21.2)      | 9.88 (-1.50, 21.3)      |
| ALR<br>per 0.01 increase                 | 5.34 (2.50, 8.19)***    | 5.33 (2.45, 8.20)***    |
| Age,<br>per 1-year increase              | -0.10 (-0.40, 0.19)     | -0.11 (-0.40, 0.19)     |
| Male                                     | -2.32 (-3.58, -1.05)*** | -2.31 (-3.59, -1.03)*** |
| BMI,<br>per 1-kg/m <sup>2</sup> increase | -0.06 (-0.31, 0.19)     | -0.06 (-0.31, 0.19)     |
| Smoking status, current                  | 0.20 (-0.87, 1.26)      | 0.20 (-0.88, 1.28)      |
| CLE+*ALR                                 | -2.73 (-5.53, 0.07)     | -2.75 (-5.58, 0.08)     |

Data are presented as the estimate (95% confidence interval). \*\*p < 0.01; \*\*\*p < 0.001.

Abbreviations: ALR, airway-to-lung ratio; BMI, body mass index; CLE, centrilobular emphysema; FEV<sub>1</sub>, forced expiratory volume in 1 second; PSE, paraseptal emphysema; WT, wall thickness.



**Table S8. Multivariable regression analysis for FEV<sub>1</sub> % predicted including interaction term between CLE and ALR**

|                                          | Model 1                | Model 2               |
|------------------------------------------|------------------------|-----------------------|
| Visual emphysema +                       |                        |                       |
| CLE +                                    | -2.87 (-5.03, -0.71)** | -2.57 (-4.87, -0.28)* |
| PSE +                                    |                        | -0.79 (-2.84, 1.25)   |
| WT subsegment<br>per 1 mm increase       | -4.78 (-29.9, 20.3)    | -4.59 (-29.7, 20.5)   |
| ALR<br>per 0.01 increase                 | 8.42 (2.13, 14.7)**    | 8.14 (1.80, 14.5)*    |
| Age,<br>per 1-year increase              | -0.21 (-0.86, 0.44)    | -0.23 (-0.88, 0.42)   |
| Male                                     | -1.62 (-4.43, 1.18)    | -1.49 (-4.31, 1.34)   |
| BMI,<br>per 1-kg/m <sup>2</sup> increase | -0.28 (-0.83, 0.27)    | -0.31 (-0.86, 0.25)   |
| Smoking status, current                  | -0.56 (-2.92, 1.81)    | -0.45 (-2.83, 1.94)   |
| CLE+*ALR                                 | -5.02 (-11.2, 1.17)    | -5.33 (-11.6, 0.91)   |

Data are presented as the estimate (95% confidence interval). \* $p < 0.05$ ; \*\* $p < 0.01$ .

Abbreviations: ALR, airway-to-lung ratio; BMI, body mass index; CLE, centrilobular emphysema; FEV<sub>1</sub>, forced expiratory volume in 1 second; PSE, paraseptal emphysema; WT, wall thickness.

**Table S9. Multivariable regression analysis for FEV<sub>1</sub>/FVC in subjects without a history of asthma**

|                                          | Model 1                | Model 2                | Model 3                | Model 4                 |
|------------------------------------------|------------------------|------------------------|------------------------|-------------------------|
| Visual emphysema +                       | -0.76 (-1.62, 0.09)    |                        |                        |                         |
| CLE +                                    |                        | -1.63 (-2.61, -0.65)** |                        | -1.72 (-2.77, -0.68)**  |
| PSE +                                    |                        |                        | -0.26 (-1.17, 0.66)    | 0.26 (-0.69, 1.20)      |
| WT subsegment<br>per 1 mm increase       | 10.1 (-1.56, 21.7)     | 11.0 (-0.41, 22.4)     | 9.49 (-2.24, 21.2)     | 10.9 (-0.48, 22.4)      |
| ALR<br>per 0.01 increase                 | 6.33 (3.78, 8.89)****  | 6.41 (3.92, 8.91)****  | 6.19 (3.62, 8.77)****  | 6.45 (3.94, 8.95)****   |
| Age,<br>per 1-year increase              | -0.15 (-0.45, 0.15)    | -0.11 (-0.40, 0.19)    | -0.17 (-0.47, 0.14)    | -0.10 (-0.40, 0.20)     |
| Male                                     | -2.12 (-3.48, -0.75)** | -2.25 (-3.58, -0.92)** | -2.14 (-3.52, -0.76)** | -2.30 (-3.64, -0.95)*** |
| BMI,<br>per 1-kg/m <sup>2</sup> increase | -0.04 (-0.30, 0.22)    | -0.07 (-0.32, 0.19)    | 0.00 (-0.26, 0.26)     | -0.06 (-0.32, 0.20)     |
| Smoking status, current                  | 0.23 (-0.88, 1.33)     | 0.23 (-0.85, 1.30)     | 0.16 (-0.96, 1.28)     | 0.19 (-0.90, 1.28)      |

Data are presented as the estimate (95% confidence interval). \*\* $p < 0.01$ ; \*\*\* $p < 0.001$ ; \*\*\*\* $p < 0.0001$ .

Abbreviations: ALR, airway-to-lung ratio; BMI, body mass index; CLE, centrilobular emphysema; FEV<sub>1</sub>, forced expiratory volume in 1 second; FVC, forced vital capacity; PSE, paraseptal emphysema; WT, wall thickness.

**Table S10. Multivariable regression analysis for FEV<sub>1</sub> % predicted in subjects without a history of asthma**

|                                          | Model 1               | Model 2                | Model 3              | Model 4               |
|------------------------------------------|-----------------------|------------------------|----------------------|-----------------------|
| Visual emphysema +                       | -2.10 (-3.99, -0.22)* |                        |                      |                       |
| CLE +                                    |                       | -3.05 (-5.24, -0.86)** |                      | -2.82 (-5.15, -0.49)* |
| PSE +                                    |                       |                        | -1.47 (-3.49, 0.54)  | -0.63 (-2.73, 1.47)   |
| WT subsegment<br>per 1 mm increase       | -4.46 (-30.0, 21.1)   | -3.43 (-28.8, 22.0)    | -5.70 (-31.5, 20.1)  | -3.32 (-28.8, 22.1)   |
| ALR<br>per 0.01 increase                 | 10.4 (4.83, 16.1)***  | 10.5 (4.92, 16.1)***   | 9.98 (4.33, 15.6)*** | 10.4 (4.82, 16.0)***  |
| Age,<br>per 1-year increase              | -0.28 (-0.95, 0.38)   | -0.21 (-0.87, 0.46)    | -0.33 (-1.00, 0.34)  | -0.22 (-0.89, 0.45)   |
| Male                                     | -1.66 (-4.65, 1.33)   | -1.98 (-4.94, 0.99)    | -1.62 (-4.65, 1.41)  | -1.87 (-4.86, 1.12)   |
| BMI,<br>per 1-kg/m <sup>2</sup> increase | -0.32 (-0.90, 0.26)   | -0.33 (-0.90, 0.24)    | -0.26 (-0.84, 0.32)  | -0.36 (-0.93, 0.22)   |
| Smoking status, current                  | -0.41 (-2.85, 2.02)   | -0.51 (-2.91, 1.89)    | -0.47 (-2.93, 1.99)  | -0.42 (-2.85, 2.00)   |

Data are presented as the estimate (95% confidence interval). \* $p < 0.05$ ; \*\* $p < 0.01$ ; \*\*\* $p < 0.001$ .

Abbreviations: ALR, airway-to-lung ratio; BMI, body mass index; CLE, centrilobular emphysema; FEV<sub>1</sub>, forced expiratory volume in 1 second; PSE, paraseptal emphysema; WT, wall thickness.
